# Supplementary material for: Toward high-performance flexible micro-supercapacitors: in situ construction of 2D porous carbon nanosheets with a unique polycrystalline-like micro-morphological feature
Source: Royal Society of Chemistry journal article supplement (doi:10.1039/d2ta06004c), 2022-01-01
Supplement: d2ta06004c1.pdf [file d2ta06004c1.pdf]

Supplementary Information

**Toward High-Performance Flexible Micro-Supercapacitors: In-Situ  
Construction of 2D Porous Carbon Nanosheets with A Unique Polycrystalline-  
like Micro-Morphological Feature**

Wenyu Wu<sup>a,b</sup>, Huaxin Ma<sup>a,b</sup>, Zhao Zhang<sup>a,b</sup>, Yu Gu<sup>c</sup>, Jingjie Zhang<sup>a,b</sup>, Shuo Li<sup>a,b</sup>,  
Ruijun Zhang<sup>a,b,\*</sup>

<sup>a</sup> State Key Laboratory of Metastable Materials Science and Technology, Yanshan  
University, Qinhuangdao 066004, China

<sup>b</sup> Hebei key lab for optimizing metal product technology and performance, Yanshan  
University, Qinhuangdao 066004, China.

<sup>c</sup> Academic Affairs Office, Tangshan Normal University, Tangshan 063000, China

\* Corresponding author.

E-mail: zhangrj@ysu.edu.cn (R. Zhang).

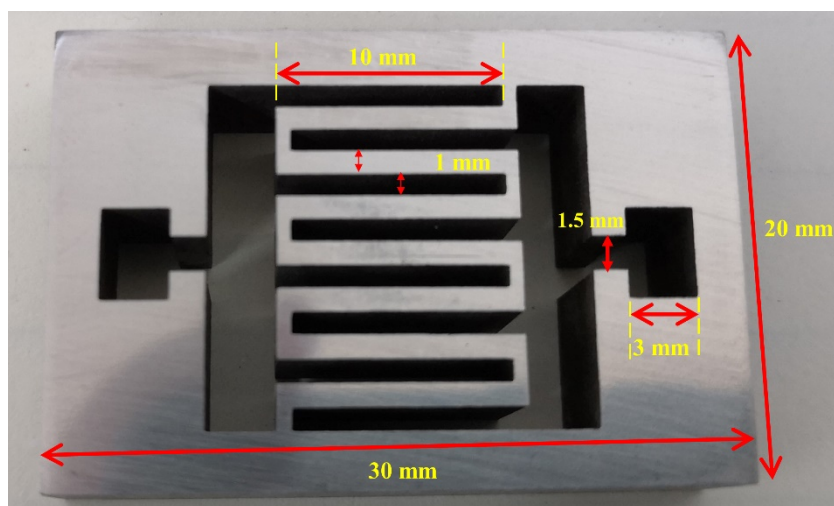

**Figure S1** The optical photo of the interdigital mask.

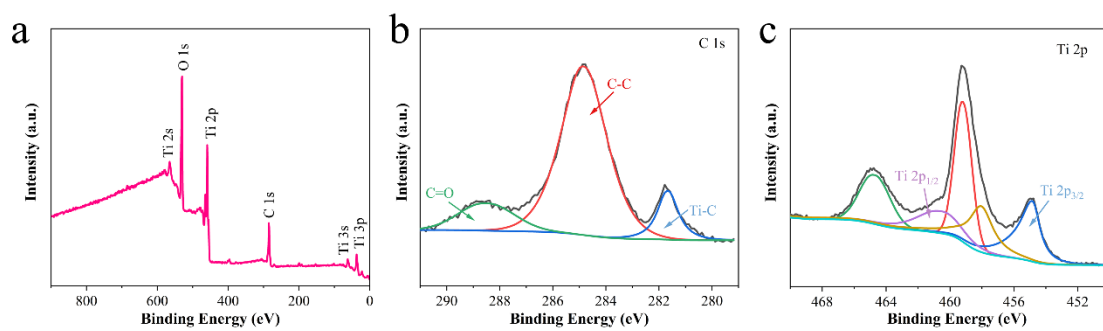

**Figure S2.** XPS spectrums of P-TiC: (a) survey spectrum; (b) C 1s; (c) Ti 2p.

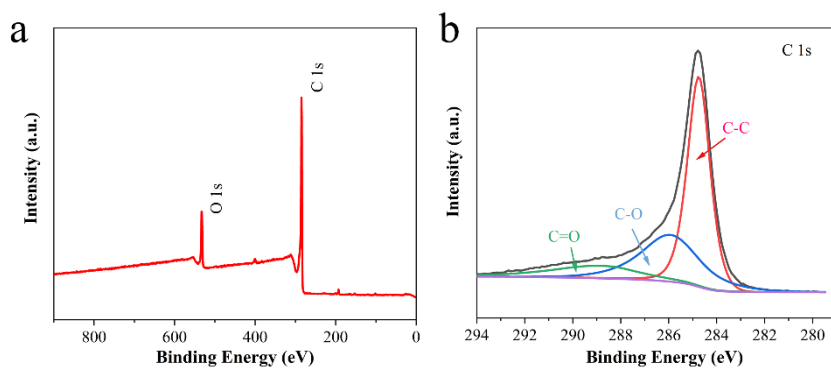

**Figure S3.** XPS spectrums of PL-PCN: (a) survey spectrum; (b) C 1s.

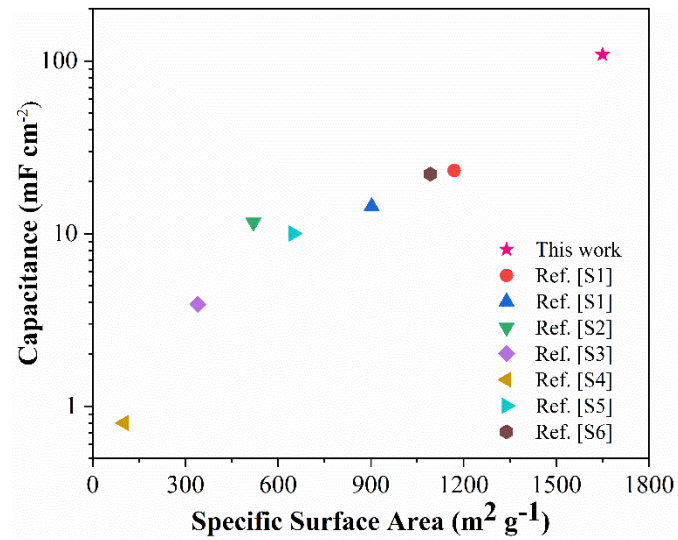

**Figure S4.** The specific capacitance as a function of the specific surface area of the electrodes summarized from the relevant literatures.

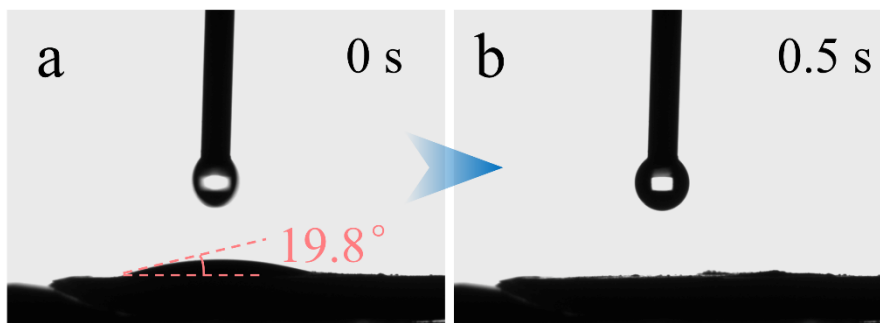

**Figure S5.** Dynamic contact angle test for PL-PCN with H<sub>3</sub>PO<sub>4</sub> electrolyte.

Figure S5 shows the dynamic contact angle test for PL-PCN with H<sub>3</sub>PO<sub>4</sub> electrolyte. It can be clearly seen that the contact angle has completely disappeared even within 0.5 s (19.8°→0°), suggesting a superior wettability.

**Table S1.** The comparison of electrochemical performance with other recently reported carbon-based MSCs works.

| Electrode material           | Electrolyte                            | Areal capacitance (mF cm <sup>-2</sup> )   | References       |
|------------------------------|----------------------------------------|--------------------------------------------|------------------|
| O/S co-doped porous graphene | PVA/H <sub>2</sub> SO <sub>4</sub>     | 53.2<br>(0.08 mA cm <sup>-2</sup> )        | [S7]             |
| Porous carbon nanosheets     | PVA/H <sub>2</sub> SO <sub>4</sub>     | 23.2<br>(0.2 mA cm <sup>-2</sup> )         | [S1]             |
| Porous carbon                | PVA/H <sub>2</sub> SO <sub>4</sub>     | 8.4<br>(100 mV s <sup>-1</sup> )           | [S8]             |
| 3D porous graphene           | PVA/H <sub>3</sub> PO <sub>4</sub>     | 1.7<br>(20 mV s <sup>-1</sup> )            | [S9]             |
| Carbon nanotubes             | PVA/H <sub>3</sub> PO <sub>4</sub>     | 4.69<br>(50 mV s <sup>-1</sup> )           | [S10]            |
| Porous graphene              | PVA/H <sub>2</sub> SO <sub>4</sub>     | 37.95<br>(0.6 mA cm <sup>-2</sup> )        | [S11]            |
| Graphene/activated carbon    | PVA/H <sub>2</sub> SO <sub>4</sub>     | 12.5<br>(0.01mA cm <sup>-2</sup> )         | [S12]            |
| Graphene quantum dots        | EMIMBF <sub>4</sub> /AN                | 0.4681<br>(15 μA cm <sup>-2</sup> )        | [S13]            |
| Fluorine-modified graphene   | EMIMBF <sub>4</sub> /PVDF-HFP          | 17.4<br>(1 mV s <sup>-1</sup> )            | [S14]            |
| <b>PL-PCN</b>                | <b>PVA/H<sub>3</sub>PO<sub>4</sub></b> | <b>108.88<br/>(0.1 mA cm<sup>-2</sup>)</b> | <b>This work</b> |

## References

- [S1] R. Zhou, C. Xu, J. Yang, D. Guan, J. Cai, Heteroatom-doped Porous Carbon Nanosheets Derived from Green Deep Eutectic Solvents for High-performance Micro-supercapacitors, *Chemistry Letters* 49(5) (2020) 585-588.
- [S2] D. Pech, M. Brunet, H. Durou, P. Huang, V. Mochalin, Y. Gogotsi, P.L. Taberna, P. Simon, Ultrahigh-power micrometre-sized supercapacitors based on onion-like carbon, *Nature nanotechnology* 5(9) (2010) 651-654.
- [S3] J. Lin, Z. Peng, Y. Liu, F. Ruiz-Zepeda, R. Ye, E.L. Samuel, M.J. Yacaman, B.I. Yakobson, J.M. Tour, Laser-induced porous graphene films from commercial polymers, *Nature communications* 5 (2014) 5714.
- [S4] J.B. In, B. Hsia, J.-H. Yoo, S. Hyun, C. Carraro, R. Maboudian, C.P. Grigoropoulos, Facile fabrication of flexible all solid-state micro-supercapacitor by direct laser writing of porous carbon in polyimide, *Carbon* 83 (2015) 144-151.
- [S5] X. Ma, X. Hong, L. He, L. Xu, Y. Zhang, Z. Zhu, X. Pan, J. Zhu, L. Mai, High Energy Density Micro-Supercapacitor Based on a Three-Dimensional Bicontinuous Porous Carbon with Interconnected Hierarchical Pores, *ACS applied materials & interfaces* 11(1) (2019) 948-956.
- [S6] Y. Qiu, M. Hou, J. Gao, H. Zhai, H. Liu, M. Jin, X. Liu, L. Lai, One-Step Synthesis of Monodispersed Mesoporous Carbon Nanospheres for High-Performance Flexible Quasi-Solid-State Micro-Supercapacitors, *Small* 15(45) (2019) 1903836.

- [S7] M. Yuan, F. Luo, Y. Rao, Y. Wang, J. Yu, H. Li, X. Chen, Laser synthesis of superhydrophilic O/S co-doped porous graphene derived from sodium lignosulfonate for enhanced microsupercapacitors, *Journal of Power Sources* 513 (2021) 230558.
- [S8] H.-C. Huang, C.-J. Chung, C.-T. Hsieh, P.-L. Kuo, H. Teng, Laser fabrication of all-solid-state microsupercapacitors with ultrahigh energy and power based on hierarchical pore carbon, *Nano Energy* 21 (2016) 90-105.
- [S9] Y. Shao, J. Li, Y. Li, H. Wang, Q. Zhang, R.B. Kaner, Flexible quasi-solid-state planar micro-supercapacitor based on cellular graphene films, *Materials Horizons* 4(6) (2017) 1145-1150.
- [S10] W. Yu, H. Zhou, B.Q. Li, S. Ding, 3D printing of carbon nanotubes-based microsupercapacitors, *ACS applied materials & interfaces* 9(5) (2017) 4597-4604.
- [S11] X. Yun, Z. Xiong, L. Tu, L. Bai, X. Wang, Hierarchical porous graphene film: an ideal material for laser-carving fabrication of flexible micro-supercapacitors with high specific capacitance, *Carbon* 125 (2017) 308-317.
- [S12] H. Chen, S. Chen, Y. Zhang, H. Ren, X. Hu, Y. Bai, Sand-milling fabrication of screen-printable graphene composite inks for high-performance planar micro-supercapacitors, *ACS Applied Materials & Interfaces* 12(50) (2020) 56319-56329.
- [S13] W.W. Liu, Y.Q. Feng, X.B. Yan, J.T. Chen, Q.J. Xue, Superior micro - supercapacitors based on graphene quantum dots, *Advanced Functional*

Materials 23(33) (2013) 4111-4122.

[S14] F. Zhou, H. Huang, C. Xiao, S. Zheng, X. Shi, J. Qin, Q. Fu, X. Bao, X. Feng, K. Müllen, Electrochemically scalable production of fluorine-modified graphene for flexible and high-energy ionogel-based microsupercapacitors, Journal of the American Chemical Society 140(26) (2018) 8198-8205.
